# Supplementary material for: Microfluidic fabrication of photo-responsive Ansamitocin P-3 loaded liposomes for the treatment of breast cancer
Source: Royal Society of Chemistry journal article supplement (doi:10.1039/d2nr06215a), 2023-01-01
Supplement: d2nr06215a1.pdf [file d2nr06215a1.pdf]

## Supporting Information

### Microfluidic fabrication of photo-responsive Ansamitocin P-3 loaded liposomes for the treatment of breast cancer

Yi Jin<sup>1,2</sup>, Mhd Anas Tomeh<sup>3</sup>, Peng Zhang<sup>4</sup>, Mingzhu Su<sup>2</sup>, Xiubo Zhao<sup>1,3,\*</sup>, Zhiqiang Cai<sup>1\*</sup>

<sup>1</sup>School of Pharmacy, Changzhou University, Changzhou 213164, China

<sup>2</sup>Department of Pharmacy, Wujin people's Hospital, Changzhou 213000, China

<sup>3</sup>Department of Chemical and Biological Engineering, University of Sheffield, Sheffield S1 3JD, UK

<sup>4</sup>School of Materials Science and Engineering, Changzhou University, Changzhou 213164, China

\*Authors for correspondence: X Zhao, E-mail: [xiubo.zhao@cczu.edu.cn](mailto:xiubo.zhao@cczu.edu.cn); Z Cai, E-mail:

[zhqcai@cczu.edu.cn](mailto:zhqcai@cczu.edu.cn).

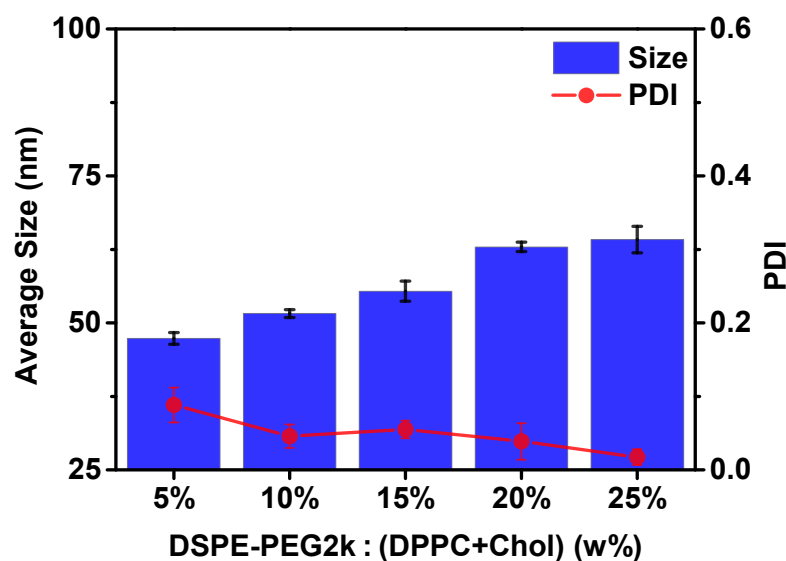

**Figure S1.** Effects of different concentrations of DSPE-MPEG2000 at ethanol solution inlet on average particle size and PDI of liposomes.

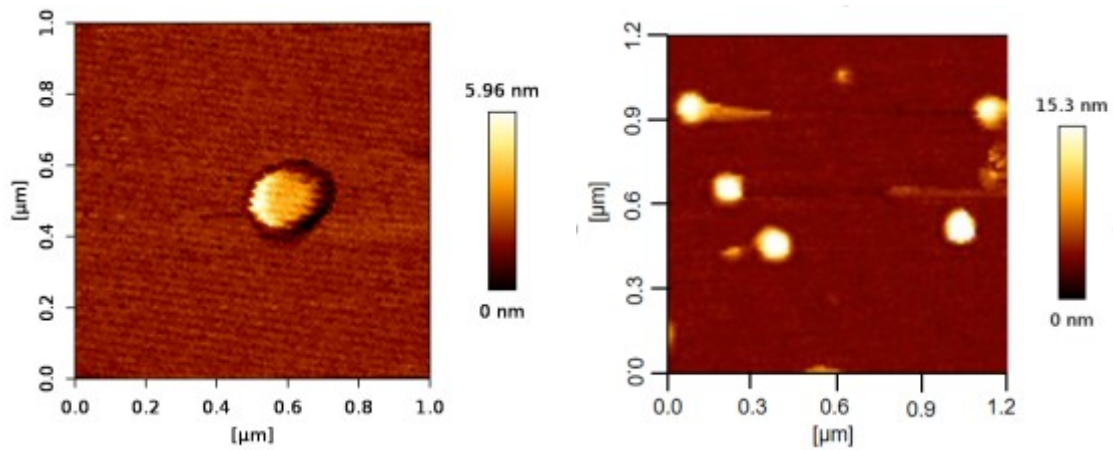

18

19 **Figure S2.** Morphology of Al-TSL.

20

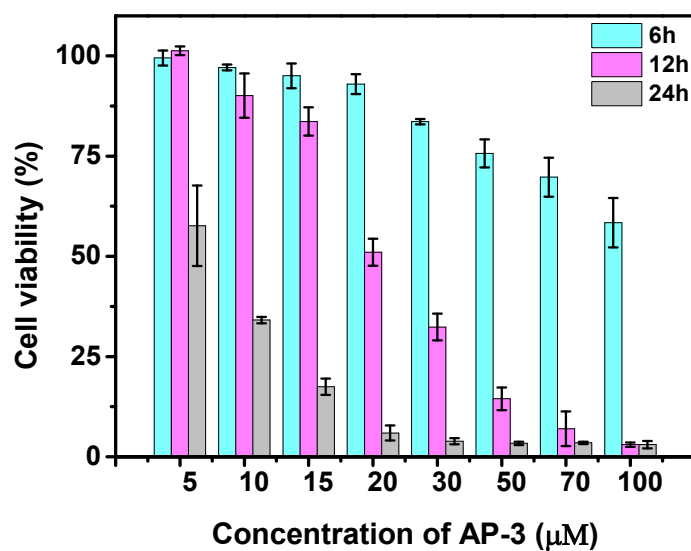

21

22 **Figure S3.** Cell viability of MCF-7 treated with free AP-3 (30 μM) at 6 h, 12 h and 24 h.

23

24

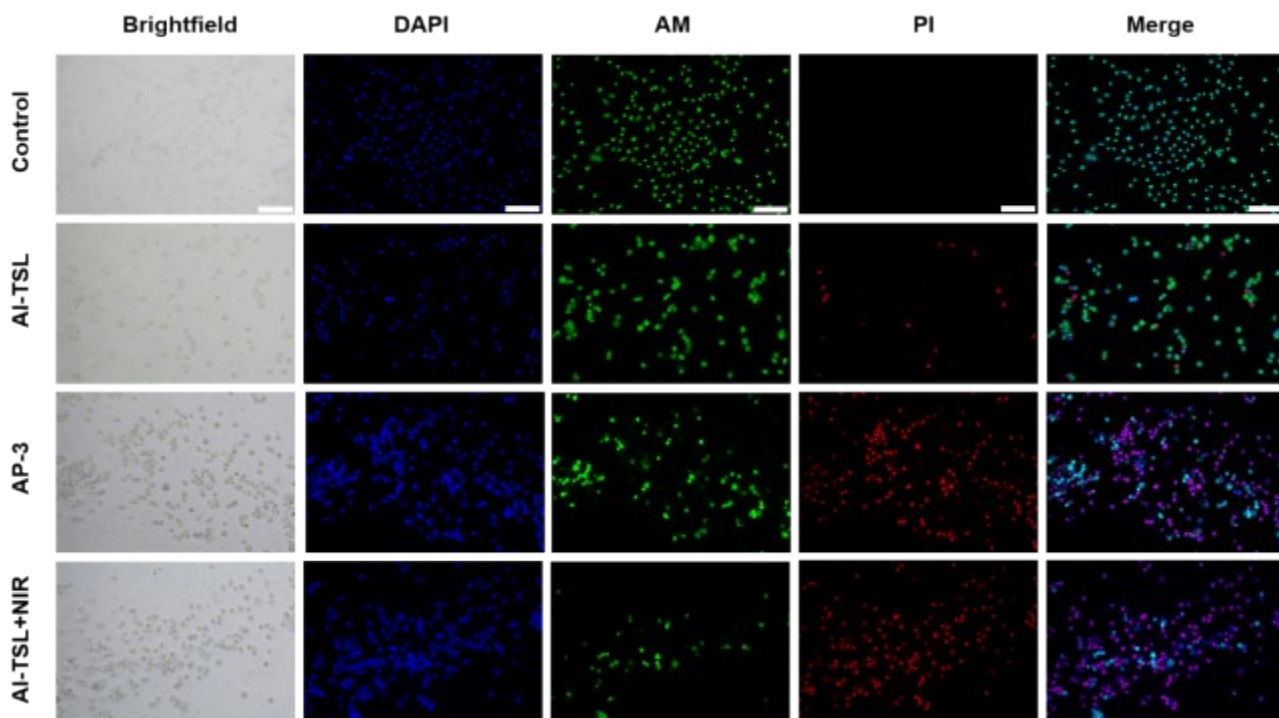

25

26 **Figure S4.** Calcein-AM/PI and DAPI staining. Free AP-3, AI-TSL and AI-TSL+NIR (AP-3=30  
 27  $\mu\text{M}$ ) treated MCF-7 cells for 12 h. Scale bar = 200  $\mu\text{m}$ .

28

29

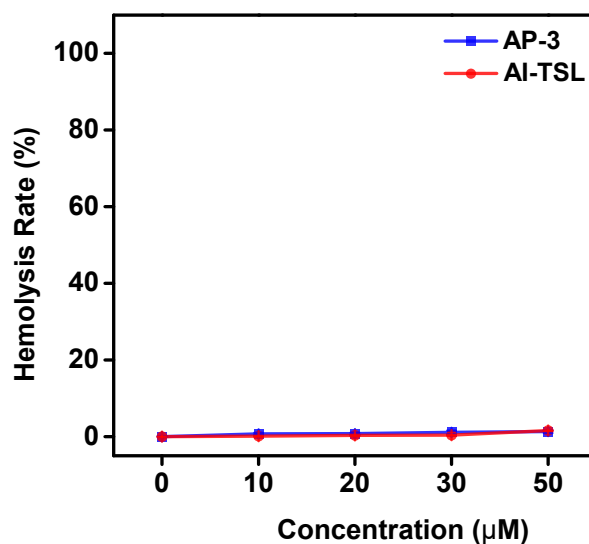

30

31 **Figure S5.** Hemolytic activity of Free AP-3 and AI-TSL at different concentrations toward  
 32 human erythrocytes.

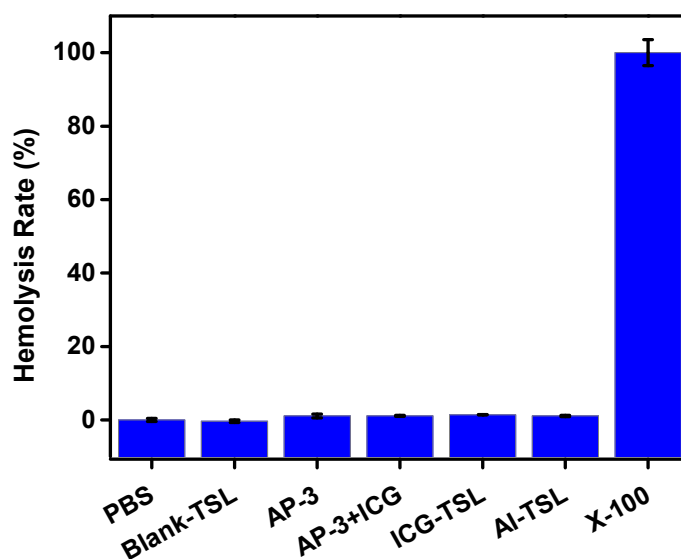

33

34 **Figure S6.** Hemolytic activity of different preparations at the same concentration (AP-3 = 30

35  $\mu\text{M}$ , ICG = 9.5  $\mu\text{M}$ ) toward human erythrocytes.

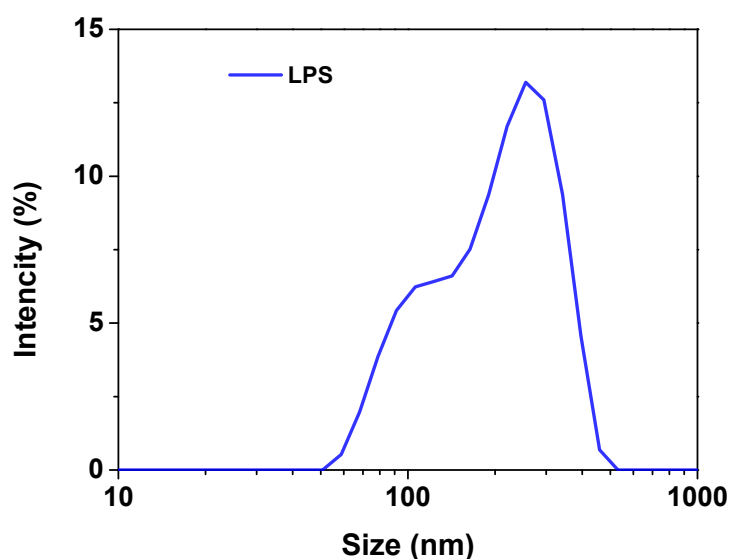

36

37 **Figure S7.** Hydrodynamic size of LPS. 10 ml 5% glucose solution was injected into the

38 ampoule before it being shaken on a vortex shaker for 5 min to dissolve the drug completely.

39 The size and PDI were measured by DLS after 20-fold dilution with 5% dextrose.

40
